# Supplementary material for: Cell‐to‐cell transmission of C9orf72 poly‐(Gly‐Ala) triggers key features of ALS/FTD
Source: PubMed Central journal article supplement — EMBO J. 2020 Mar 16;39(8):e102811. doi: 10.15252/embj.2019102811 (PMC7156967; doi:10.15252/embj.2019102811), 2020-03-16
Supplement: EMBJ-39-e102811-s002.pdf [file EMBJ-39-e102811-s002.pdf]

## Expanded View Figures

### Figure EV1. Poly-GA induces cytoplasmic TDP-43 mislocalization.

- A, B Immunofluorescence analysis of endogenous TDP-43 in the anterior horn of the spinal cord of  $GA_{149}$ -CFP transgenic mice 8–12 months of age (Schludi *et al*, 2017). Single confocal sections are shown in (A). Arrow indicates neuron with cytoplasmic TDP-43 punctae. (B) Manual quantification of neurons with cytoplasmic TDP-43 in the anterior horn. To allow blinded quantification, poly-GA expression was not taken into account. Scatter plot with bar graphs of mean  $\pm$  SD. Statistical analysis using unpaired *t*-test and Welch's correction (three wild-type and six transgenic animals).
- C Immunoblotting of three wild-type and three  $GA_{149}$ -CFP transgenic mice spinal cord 8 months of age. Immunoblotting of one wild-type and one  $GA_{149}$ -CFP transgenic mouse spinal cord is shown. Proteolytic processing of TDP-43 was not detected in both genotypes.
- D Immunofluorescence analysis of endogenous TDP-43 in large ChAT-positive motoneurons in the anterior and posterior horns of the spinal cord of  $GA_{149}$ -CFP transgenic mice 8–12 months of age (Schludi *et al*, 2017). Maximum intensity projections are shown. Arrow indicates neurons with cytoplasmic TDP-43 punctae.
- E, F Automated analysis of cytoplasmic mislocalization of TDP-43 in frontal cortex of *C9orf72* FTLD patients. Representative raw image and the resulting CellProfiler mask (see Materials and Methods for details). Poly-GA-positive neurons were significantly more likely to have detectable cytoplasmic TDP-43 than neighboring poly-GA-negative neurons (paired *t*-test  $t(7) = 5.58$ , partial  $\eta^2 = 0.816$ , mean  $\pm$  SD).

Data information: \*\* $P < 0.01$ , \*\*\* $P < 0.001$ . Scale bars: 50  $\mu$ m.

Source data are available online for this figure.

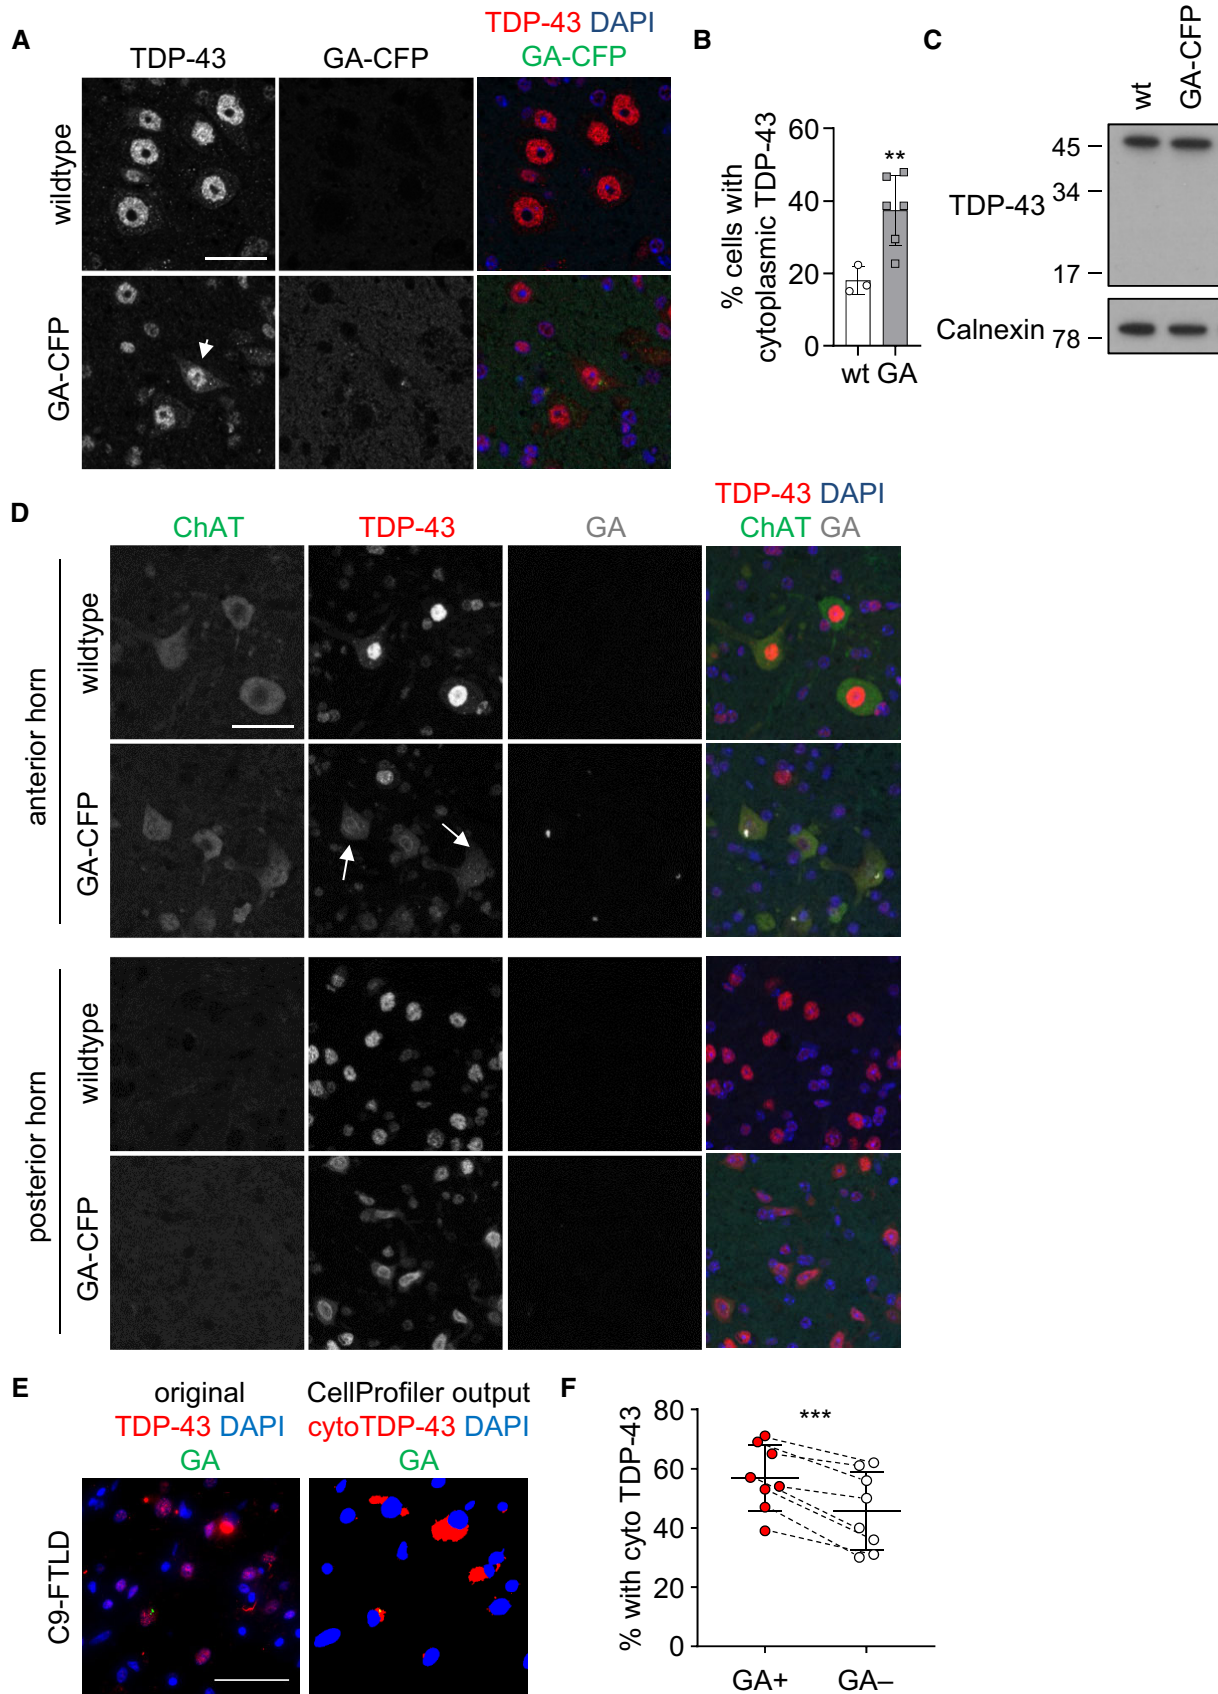

Figure EV1.

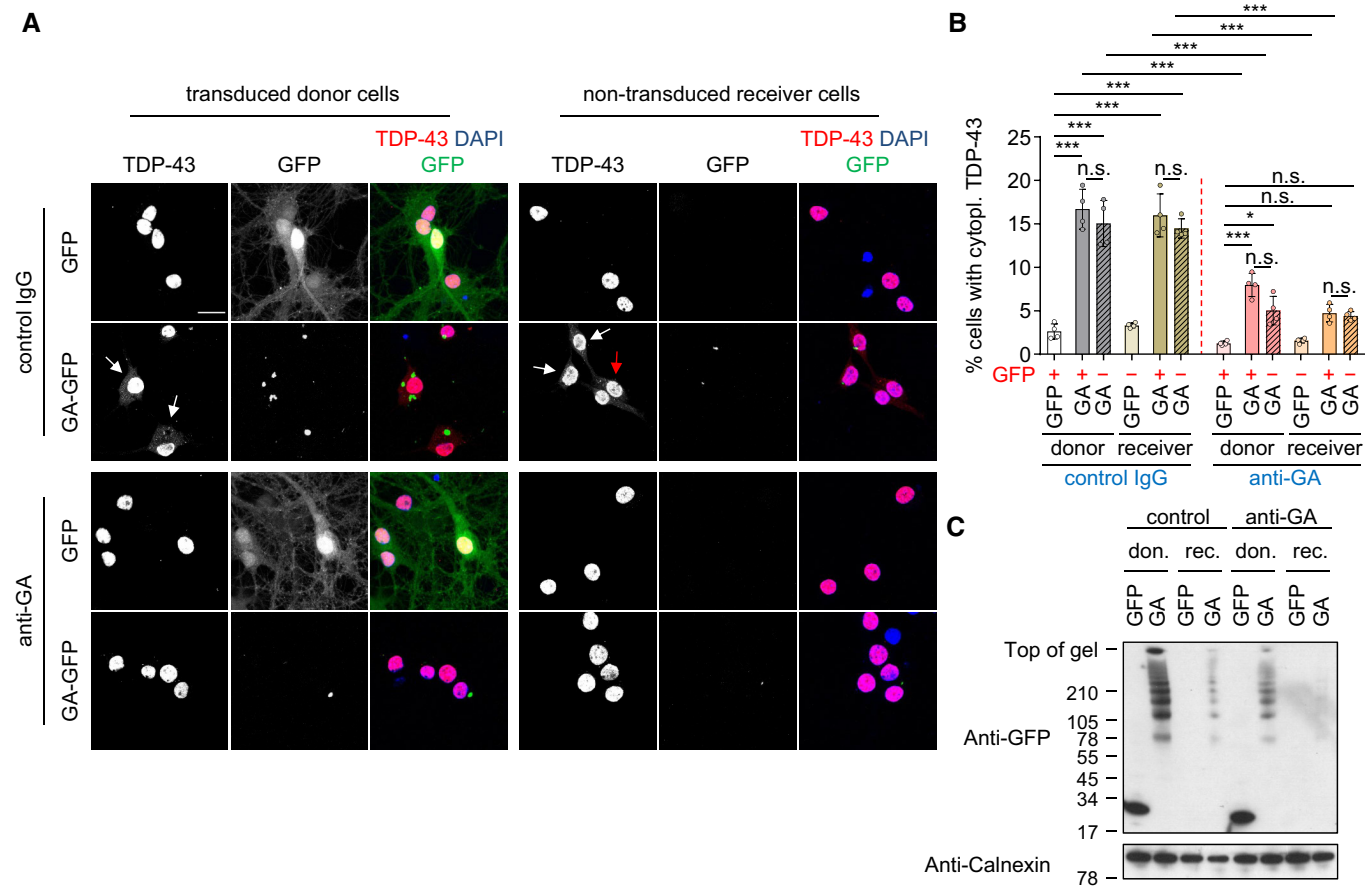

**Figure EV2. Anti-GA antibodies block the non-cell-autonomous effects of poly-GA on TDP-43 in a co-culture assay.**

Primary hippocampal neurons were transduced with GFP or  $GA_{175}$ -GFP (DIV4 + 4) and treated with IgG control and anti-GA (5F2) antibody.

**A** Confocal imaging revealed that anti-GA antibody treatment reduces Poly-GA-induced cytoplasmic mislocalization of TDP-43 in hippocampal neurons. White and red arrows show cells with cytoplasmic TDP-43 in GFP-positive and GFP-negative cells, respectively. Scale bar denotes 20  $\mu$ m.

**B** Automated quantification of cells with cytoplasmic TDP-43 in GFP or  $GA_{175}$ -GFP-transduced cells. Cells with and without GFP signal were analyzed separately (indicated by +/-). As in Fig 1C, GFP-negative donor and GFP-positive receiver cells were excluded due to high transduction and low transmission rate of GFP.  $n = 4$  biological replicates. Scatter plot with bar graphs of mean  $\pm$  SD. One-way ANOVA with Tukey's multiple comparisons test. \* $P < 0.05$ , and \*\*\* $P < 0.001$ .

**C** Immunoblotting shows reduced poly-GA expression upon anti-GA antibody treatment.

Source data are available online for this figure.

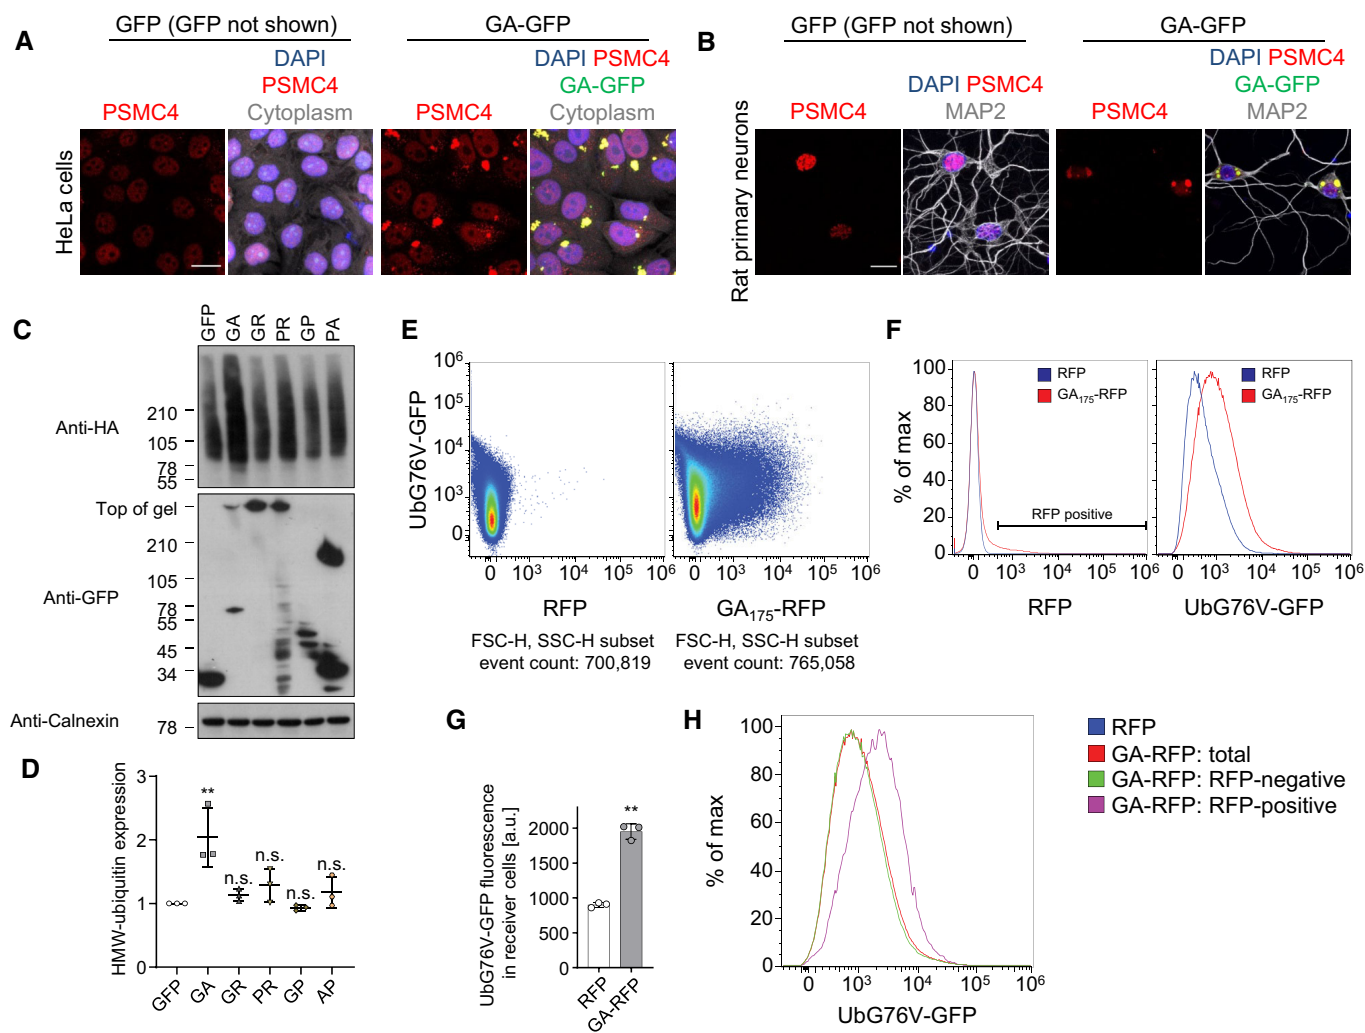

### Figure EV3. Poly-GA inclusions sequester the proteasome.

- A, B Immunofluorescence of the proteasome subunit PSMC4 and poly-GA inclusions in GA<sub>175</sub>-GFP-transfected HeLa cells and GA<sub>175</sub>-GFP-transduced rat primary neurons. To confirm cell viability, the cytoplasm of HeLa cells was stained with HCS CellMask™ Deep Red Stain and neuronal dendrites were labeled with MAP2. Scale bar denotes 20 μm.
- C, D Immunoblots of HeLa cells that were co-transfected with HA-ubiquitin and GFP, GA<sub>175</sub>-GFP, GFP-GR<sub>149</sub>, PR<sub>175</sub>-GFP, GFP-GP<sub>47</sub>, and PA<sub>175</sub>-GFP and incubated for 48 h and analyzed by densitometry. Scatter plot, mean ± SD. One-way ANOVA with Tukey's multiple comparisons test. \*\**P* < 0.01.
- E–H Flow cytometry analysis of non-cell-autonomous proteasome inhibition using HEK293 Ub<sub>G76V</sub>-GFP reporter cells co-cultured for 48 h with GA<sub>175</sub>-RFP- or RFP-transfected cells. (E) Two-color scatter plots, presented as pseudo-color density plots, with compensated RFP fluorescence plotted on the x-axis and compensated GFP fluorescence on the y-axis. A representative experiment out of three independent repeats is shown. (F) Comparisons of the corresponding histograms for compensated RFP and Ub<sub>G76V</sub>-GFP fluorescence from one representative experiment that shows specific transmission of GA<sub>175</sub>-RFP associated with accumulation of Ub<sub>G76V</sub>-GFP in cells co-cultured with GA<sub>175</sub>-RFP. (G) Accumulation of Ub<sub>G76V</sub>-GFP signal in non-transfected receiver cells that were co-incubated for 48 h with GA<sub>175</sub>-RFP-transfected donor cells compared with RFP control. *n* = 3 biological replicates. Scatter plot with bar graphs of mean ± SD. Unpaired two-tailed *t*-test with Welch's correction. \*\**P* < 0.01. (H) Histograms for Ub<sub>G76V</sub>-GFP intensity showing separate analysis of RFP-positive and RFP-negative receiver cells for the GA<sub>175</sub>-RFP condition. RFP gating as indicated in (F).

Source data are available online for this figure.

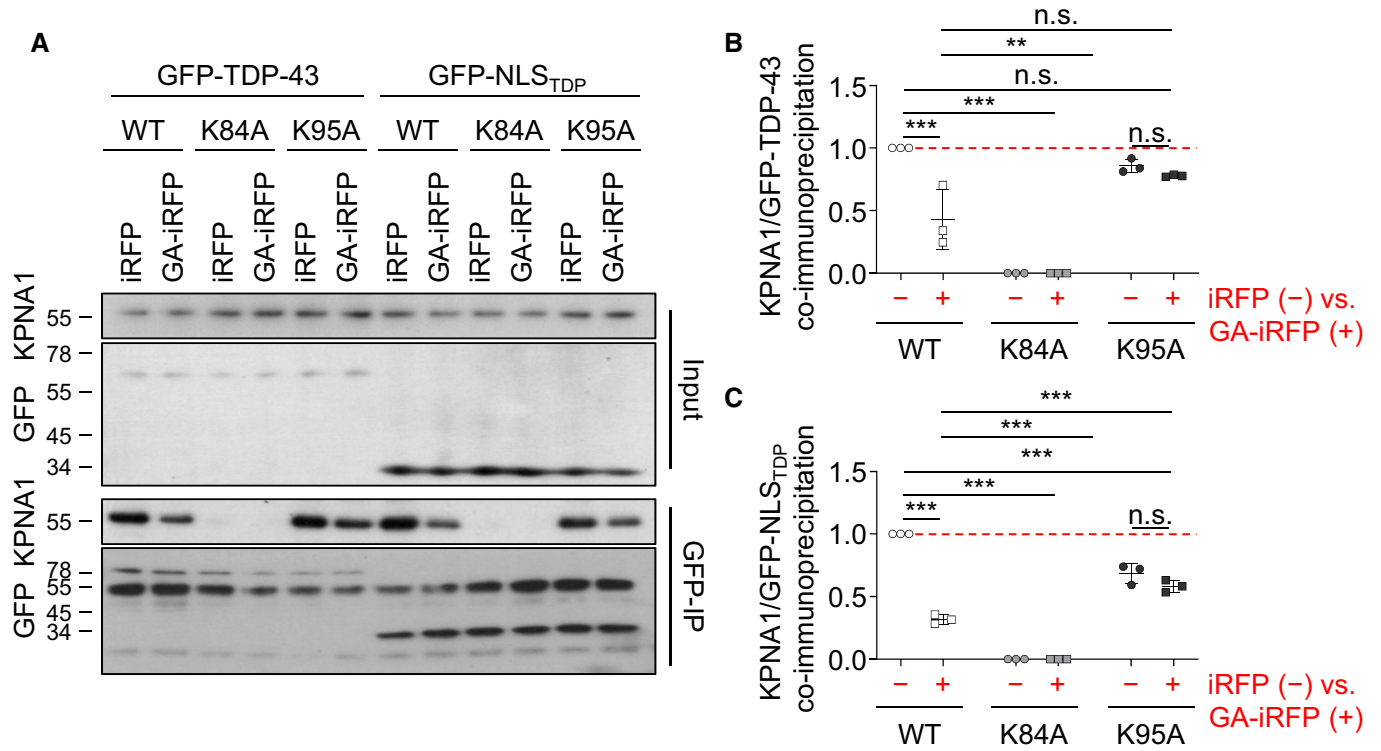

**Figure EV4. Poly-GA reduces KPNA1 binding of full-length TDP-43.**

A HeLa cells were co-transfected with either full-length GFP-TDP-43 (wild type, K84A, K95A) or GFP-NLS<sub>TDP</sub> (wild type, K84A, K95A) as well as iRFP or GA<sub>175</sub>-iRFP and incubated for 48 h. Lysates were immunoprecipitated with anti-GFP and immunoblotted with an anti-importin- $\alpha$ 5/KPNA1 antibody to detect binding of the nuclear import receptor. Protein expression in the input is also shown.

B, C Quantification of KPNA1 levels normalized to total GFP-TDP-43 and GFP-NLS<sub>TDP</sub> reporter levels in anti-GFP immunoprecipitates.  $n = 3$  biological replicates. Scatter plot with mean  $\pm$  SD. One-way ANOVA with Tukey's multiple comparisons test. \*\* $P < 0.01$ , \*\*\* $P < 0.001$ . Red dashed line indicates the control's expression level.

Source data are available online for this figure.

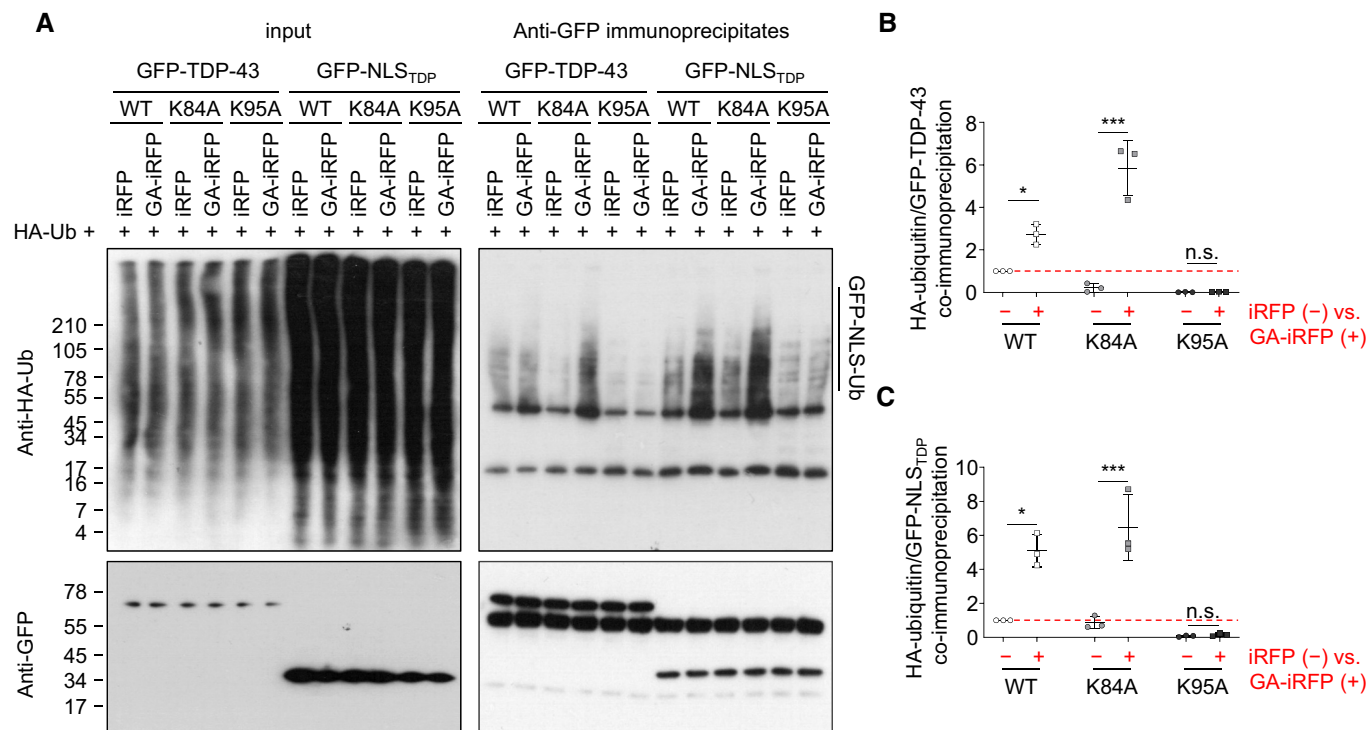

**Figure EV5. Poly-GA induces poly-ubiquitination of TDP-43 at lysine 95.**

A–C HeLa cells were co-transfected with either full-length GFP-TDP-43 (wild type, K84A, K95A) or GFP-NLS<sub>TDP</sub> (wild type, K84A, K95A) as well as HA-ubiquitin and iRFP or GA<sub>175</sub>-iRFP, and incubated for 48 h. Lysates were immunoprecipitated with anti-GFP antibody. Immunoblotting of input (left panels) and anti-GFP immunoprecipitates (right panels) to show TDP-43 bait levels and poly-ubiquitination. (B, C) Quantification of HA-ubiquitin levels normalized to total GFP-TDP-43 and GFP-NLS<sub>TDP</sub> reporter levels in anti-GFP immunoprecipitates. *n* = 3 biological replicates. Scatter plot, mean ± SD. One-way ANOVA with Tukey's multiple comparisons test. \**P* < 0.05, and \*\*\**P* < 0.001. Red dashed line indicates the control's expression level.

Source data are available online for this figure.
